# Supplementary material for: The synthesis of angularly fused tricyclic compounds via tandem ring closing metathesis reactions
Source: Royal Society of Chemistry journal article supplement (doi:10.1039/b002136i), 2000-01-01
Supplement: b002136i.doc [file b002136i.doc]

**The Synthesis of Angularly Fused Tricyclic Compounds**

**via Tandem Ring Closing Metathesis Reactions**

Martin J. Bassindale, Andrew S. Edwards, Peter Hamley, Harry Adams and Joseph P.A. Harrity*

**Supporting Information**

**General.** Infrared (IR) spectra were recorded on a Perkin Elmer Paragon 100 FTIR spectophotometer as a solution in dichloromethane, max in cm-1. Bands are characterized as broad (br), strong (s), medium (m), and weak (w). 1H NMR spectra were recorded on a Bruker AC-250 (250 MHz). Chemical shifts are reported in ppm from tetramethylsilane with the solvent resonance as the internal standard (CHCl3: 7.27 ppm). Data are reported as follows: chemical shift, integration, multiplicity (s=singlet, d=doublet, t=triplet, q=quartet, pent=pentet, br=broad, m=multiplet, app=apparent), coupling constants (Hz). 13C NMR spectra were recorded on a Bruker AC-250 (62.9 MHz) with complete proton decoupling. Chemical shifts are reported in ppm from tetramethylsilane with the solvent as the internal reference (CDCl3:  77.0 ppm). Elemental analysis was performed using a Perkin Elmer 2400 CHN elemental analyser. High resolution mass spectra were obtained using a Kratos MS 80 spectrometer supported by a DS 90 data system.

All reactions were conducted in flame-dried glassware under an inert atmosphere of dry nitrogen. All reagents were used as received unless otherwise stated. Tetrahydrofuran was distilled from sodium metal/benzophenone ketyl, dichloromethane and dichloroethane were distilled from calcium hydride.

**Synthesis of 1,2,2,3-Tetraallyl-cyclopentane-1,3-diol. Compounds (2-*Syn*) and (3-*Anti*)**

Allyl magnesium chloride (2.0 M solution in THF, Aldrich Chemical Co.) (17.5ml, 35mmol) was diluted with further THF (6.7ml) then stirred at 0°C in an ice bath before a solution of 2,2-diallyl-cyclopentane-1,3-dione1 (1.20g, 6.7mmol) in THF (3ml) was added rapidly *via* syringe. The reaction mixture was allowed to warm to room temperature and stirred for 2h. The reaction was quenched with water, acidified with NH4Cl (aq.) then extracted with DCM. Careful purification on silica gel using increasingly polar eluants of hexanes; 20:1 hexanes:EtOAc; then 10:1 hexanes:EtOAc supplied both diastereoisomer products of 1,2,2,3-tetraallyl-cyclopentanediol. (**2**-***Syn*** 1.11g, 63%, white solid), (**3-*Anti*** 175mg, 10%, white solid).

**2:** M.p. = 52-53 ˚C. 1H NMR (250 MHz, CDCl3): 1.85 (4H, s), 2.18-2.26 (2H, dt, *J*=7.0, 1.5 Hz), 2.26-2.48 (4H, m), 2.48-2.54 (2H, dt, *J*=7.3, 1.2 Hz), 3.25 (2H, br), 5.02-5.19 (8H, m), 5.82-6.14 (4H, m). 13C NMR (62.9 MHz, CDCl3): 34.3, 36.4, 37.1, 41.4, 56.2, 85.9, 117.4, 117.6, 118.2, 134.5, 136.0, 136.2. FTIR : 3563 (m), 3488 (br), 3077 (m), 3011 (w), 2978 (m), 2941 (m), 2869 (w), 1636 (s) cm-1. HRMS Calcd for C17H26O2: (MH+) 263.2011. Found: 263.2018.

**3:** M.p. = 39-41 ˚C. 1H NMR (250 MHz, CDCl3): 1.44-1.64 (2H, m), 1.72 (2H, br), 1.94-2.10 (2H, m), 2.25-2.39 (4H, m), 2.39-2.51 (2H, ddt, *J*=14.8, 6.6, 1.5 Hz), 2.56-2.68 (2H, ddt, *J* = 13.7, 6.6, 0.5 Hz), 5.04-5.21 (8H, m), 5.82-6.00 (2H, dddd, *J* = 17.0, 10.4, 8.0, 6.6 Hz), 6.00-6.17 (2H, dddd, *J* = 17.2, 10.0, 7.5, 6.9 Hz). 13C NMR (62.9 MHz, CDCl3): 35.5, 35.7, 43.4, 55.9, 83.6, 117.2, 119.3, 134.6, 137.2. FTIR : 3569 (br), 3077 (m), 3090 (w), 2977 (m), 1636 (s), 1437 (m) cm-1. HRMS Calcd for C17H26O2: (MH+) 263.2011. Found: 263.2020.

# Synthesis of *Syn*-1,4,5,6,7,10-Hexahydro-benzo[*c*]indene-4a,6a-diol (4)

A solution of *syn*-1,2,2,3-tetraallyl-cyclopentanediol **(2)** (100mg, 0.38mmol) was dissolved in dry, distilled 1,2-dichloroethane (3ml). A solution of Grubbs benzylidene catalyst **(I)** (16mg, 0.019mmol, 5 mol %) in 1,2-dichloroethane (1ml) was added *via* syringe and the reaction mixture was heated at 60°C under N2 overnight. A further 3 x 5 mol % portions of **(I)** were added over the following 36h. After removal of solvent, the product mixture was purified chromatographically using 2:1 hexane:EtOAc to supply the desired tricycle **(4)** (30mg, 38% yield).

**4:** M.p. = 139.5-141 ˚C. 1H NMR (250 MHz, CDCl3): 1.56-1.72 (2H, m), 1.83-2.03 (4H, m), 2.07-2.20, (2H, m), 2.21-2.27 (1H, m), 2.28-2.35 (2H, m), 2.36-2.41 (1H, m), 2.45-2.52 (1H, m), 2.53-2.60 (1H, m), 2.75 (1H, br), 4.65 (1H, br), 5.40-5.87 (4H, m). 13C NMR (62.9 MHz, CDCl3): 26.5, 32.9, 33.2, 33.8, 35.5, 36.3, 46.3, 80.6, 83.6, 123.4, 124.5, 127.8. FTIR : 3683 (w), 3555 (w), 3455 (m), 3030 (w), 2972 (m), 2910 (m), 2840 (w), 1451 (w), 1448 (w), 1430 (w), 1270 (m), 1246 (w), 1059 (m) cm-1. HRMS Calcd for C13H18O2: (MH+) 207.1385. Found: 207.1376.

# Synthesis of *Anti-*1,4,5,6,7,10-Hexahydro-benzo[*c*]indene-4a,6a-diol (5)

A solution of *anti-*1,2,2,3-tetraallyl-cyclopentanediol **(3)** (50mg, 0.19mmol) was dissolved in dry, distilled 1,2-dichloroethane (2ml). Grubbs benzylidene catalyst **(I)** (8mg, 0.0095mmol, 5mol%) in 1,2-dichloroethane (1ml) was added *via* syringe then the reaction mixture was heated to 60°C under N2 overnight. A further 5 mol % of **(I)** was added after 24h. Solvent was removed *in vacuo* and the product mixture was purified chromatographically using 2:1 hexane:EtOAc to supply the desired tricycle **(5)** (28mg, 72% yield).

**5:** 1H NMR (250 MHz, CDCl3): 1.50-1.70 (2H, br), 1.70-2.04 (6H, m), 2.14-2.38 (4H, m), 2.46-2.58 (2H, m), 5.54-5.71 (4H, m). 13C NMR (62.9 MHz, CDCl3): 33.53, 35.28, 39.09, 61.26, 80.75, 125.01, 125.67. FTIR : 3681 (w), 3583 (m), 3029 (m), 2913 (s), 2834 (w), 1733 (w), 1664 (w), 1466 (w), 1272 (w), 1247 (w), 1192 (m), 1056 (w) cm-1. HRMS Calcd for C13H18O2: (MNH4+) 224.1651. Found: 224.1644.

**Synthesis of 1,4-Diallyl-spiro[4.4]non-7-ene-1,4-diol. Compounds (8-*Syn*) and (9-*Anti*)**

Allyl magnesium chloride (2.0 M solution in THF, Aldrich Chemical Co.) (3.7ml, 7.5mmol) was diluted with further THF (10ml) then stirred at 0°C under N2 in an ice bath before a solution of spiro[4.4]non-7-ene-1,4-dione **(7)**2 (280mg, 1.87mmol) in THF (2ml) was added rapidly *via* syringe. The reaction mixture was allowed to warm to room temperature and stirred for 2h. The reaction mixture was quenched with water, acidified with NH4Cl (aq.) then extracted with DCM. Careful purification on silica gel using 5:1 hexanes:EtOAc supplied both diastereoisomer products. ***Syn*-(8)** was recovered as a white solid (180mg, 45%) and the ***anti*-(9)**, as pale yellow oil. (86mg, 21%).

**8:** M.p. = 70-72 ˚C. 1H NMR (250 MHz, CDCl3): 1.76-1.96 (4H, m), 2.17-2.22 (2H, app pent, *J*=2.4 Hz), 2.23-2.30 (4H, m), 2.52-2.57 (2H, app pent, *J*=2.4 Hz), 3.55 (2H, br), 5.06-5.17 (4H, m), 5.52-5.60 (1H, m), 5.65-5.72 (1H, m), 5.82-6.00 (2H, m). 13C NMR (62.9 MHz, CDCl3): 33.12, 35.25, 38.86, 41.04, 61.2, 85.30, 118.51, 127.9, 130.84, 134.34. FTIR : 3563 (m), 3463 (s), 3076 (w), 3050 (w), 2932 (s), 2862 (w) 1638 (m), 1407 (s), 1000 (m) cm-1. Anal calcd for C15H22O2: C, 76.88; H, 9.46. Found: C, 76.83; H, 9.57.

**9:** 1H NMR (250 MHz, CDCl3): 1.55-1.60 (2H, m), 1.75 (2H, br), 1.98-2.02 (2H, m), 2.18-2.31 (4H, m), 2.62-2.78 (4H, m), 5.09-5.22 (4H, m), 5.65 (2H, m), 5.80-6.01 (2H, dddd, *J* = 17.0, 14.7, 8.2, 6.4 Hz). 13C NMR (62.9 MHz, CDCl3): 34.2, 35.3, 43.5, 62.9, 81.9, 119.3, 129.6, 134.8. FTIR: 3566 (m), 3463 (s) 3077 (w), 3047 (w), 2935 (s), 2870 (m), 1638 (m), 1407 (m), 1209 (m), 1000 (s) cm-1. HRMS Calcd for C15H22O2: 234.1620. Found: 234.1618.

# Synthesis of 6,10-Diallyl-spiro[4,5]dec-2-ene-6,10-diol. Compounds (13-*Syn*) and (14-*Anti*)

Allyl magnesium chloride (2.0 M solution in THF, Aldrich Chemical Co.) (8.5ml, 17.1mmol) was diluted with further THF (30ml) then stirred at 0°C under N2 in an ice bath before a solution of spiro[4.5]dec-2-ene-6,10-dione **(11)**2 (560mg, 3.4mmol) in THF (4ml) was added rapidly *via* syringe. The reaction mixture was allowed to warm to room temperature and stirred for 2h. The reaction was quenched with water, acidified with NH4Cl (aq.) then extracted with DCM. Careful purification on silica gel using 7:1 hexanes:EtOAc supplied both diastereoisomer products (85% yield) as white solids. ***Syn*-(12)** (490mg, 58%). ***Anti*-(13)** (228mg, 27%).

**12:** M.p. = 116-118 ˚C. 1H NMR (250 MHz, CDCl3): 1.25-1.90 (6H, m), 2.04 (2H, dd, J=13.7, 7.3 Hz), 2.18-2.29 (4H, m), 2.67 (2H, m), 3.60 (2H, br), 5.04-5.18 (4H, m), 5.52-5.58 (1H, m), 5.67-5.74 (1H, m), 5.77-5.97 (2H, ddt, *J* = 17.4, 10.0, 7.3 Hz). 13C NMR (62.9 MHz, CDCl3): 16.38, 32.74, 35.59, 39.65, 40.97, 54.50, 77.38, 119.00, 128.79, 131.35, 133.89. FTIR : 3685 (s), 3600 (m), 3460 (br), 3064, 2934 (s), 1605 (s) cm-1. Anal calcd for C16H24O2: C, 77.38; H, 9.74. Found: C, 77.19; H, 9.77.

**13:** M.p. = 41-44 ˚C. 1H NMR (250 MHz, CDCl3): 1.4 (2H, m), 1.7 (6H, m), 2.20 (4H, m), 2.75 (4H, m), 5.05-5.20 (4H, m), 5.65 (2H, br), 5.85 (2H, ddt, *J* = 17.1, 9.2, 7.9 Hz). 13C NMR (62.9 MHz, CDCl3): 134.61, 130.06, 119.66, 76.02, 57.35, 53.0, 41.19, 32.90, 18.65. FTIR : 3684 (w), 3562 (m), 3076 (w), 2942 (s), 2870 (m), 1635 (m), 1442 (m), 1347 (m), 1308 (m) cm-1. Anal calcd for C16H24O2: C, 77.38; H, 9.74. Found: C, 77.01; H, 9.83.

**Synthesis of Spirocarbonate (14)**

To a stirred solution of 4-dimethylaminopyridine (DMAP) (2.4mg, 0.02mmol), pyridine (0.097ml, 1.2mmol), and spirocycle **(12)** (100mg, 0.40mmol) in dichloromethane (4.0ml) at 0°C under N2 was added oxalyl chloride (0.05ml, 0.60mmol). The reaction effervesced then immediately formed a yellow suspension. The reaction was allowed to warm to room temperature with stirring for two hours. The reaction was carefully quenched with ice water, acidified with NH4Cl (aq.) then extracted with DCM. Purification on silica gel with 5:1 hexane:EtOAc provided carbonate **(14)** as a crystalline white solid. (64mg, 58% yield).

**14:** M.p. = 107-108 ˚C. 1H NMR (250 MHz, CDCl3): 1.6 (4H, m), 2.1 (4H, m), 2.34 (2H, app pent, *J*=2.3 Hz), 2.46-2.60 (2H, m), 2.69 (2H, app pent, *J*=2.3 Hz), 5.04-5.17 (4H, m), 5.58-5.64 (1H, m), 5.70-5.76 (1H, m), 5.80-5.99 (2H, ddt, *J* = 19.5, 10.1, 5.5 Hz). 13C NMR (62.9 MHz, CDCl3): 16.48, 30.57, 35.96, 38.08, 39.18, 49.46, 87.42, 119.37, 128.87, 129.90, 132.05, 168.3. FTIR : 3065 (w), 2956 (m), 2932 (m), 2885 (w), 1734 (s), 1641 (m), 1468 (w), 1429 (w), 1341 (s), 1294 (s) cm-1. HRMS Calcd for C17H22O3 (MH+): 275.1647. Found: 275.1642.

A solution of mono silyl ether **(15)** (200mg, 0.55mmol) was dissolved in dry benzene (5.5ml). Grubbs benzylidene catalyst **(I)** (45mg, 0.055mmol, 5mol%) was added and the reaction mixture was heated at reflux under N2 overnight. A further 5mol % of Grubbs catalyst **(I)** was added after 24h and the reaction mixture was heated for a further 24h. The product mixture was purified chromatographically using 7:1 hexane:EtOAc to supply the monosilylated bridged bicycle intermediate. (120mg, 65% yield).

To a solution of mono silylated bridged bicycle (167mg, 0.50mmol) in tetrahydrofuran (3ml) was added 1.0M TBAF in tetrahydrofuran (1.5ml, 1.5mmol) and the reaction mixture heated at reflux overnight. Purification on silica gel using 5:1 hexane:EtOAc supplied the desired bridged bicycle (**16)** as a colourless crystalline solid, which could be recrystallised from hexane (110mg, 99%).

**17:** M.p. = 84-85 ˚C. 1H NMR (400 MHz, CDCl3): 1.42-1.52 1H, m. 1.55 (2H, br), 1.63-1.70 (2H, ddd, *J* = 13.5, 4.7, 2.1 Hz), 1.75-1.85 (2H, ddd, *J* = 13.5, 10.9, 2.1 Hz), 2.00-2.15 (1H, m), 2.30-2.35 (2H, m), 2.57 (2H, m), 2.61-2.67 (2H, m), 2.75 (2H, m), 5.44 (2H, dd, *J* = 3.2, 2.9 Hz), 5.74 (2H, m). 13C NMR (100.6 MHz, CDCl3): 20.7, 35.0, 38.2, 38.5, 43.3, 58.7, 75.9, 125.6, 130.1, 131.1. FTIR : 3685 (w), 3597 (w), 3054 (s), 2986 (w), 2929 (w), 1605 (w), 1271 (s), 1260 (s) cm-1. HRMS Calcd for C14H20O2 : 220.1463. Found: 220.1465.

**References**

1. E.C. Schwartz and D.P. Curran, *J. Am. Chem. Soc.*, **1990**, *112*, 9272.

2. S. Kotha, E. Manivannan, T. Ganesh, N. Sreenivasachary, and A. Deb, *Synlett* **1999**, 1618.
